# Supplementary material for: Twenty two cases of canine neural angiostrongylosis in eastern Australia (2002-2005) and a review of the literature
Source: PubMed Central journal article supplement (PMC3361490; doi:10.1186/1756-3305-5-70), 2012-04-05

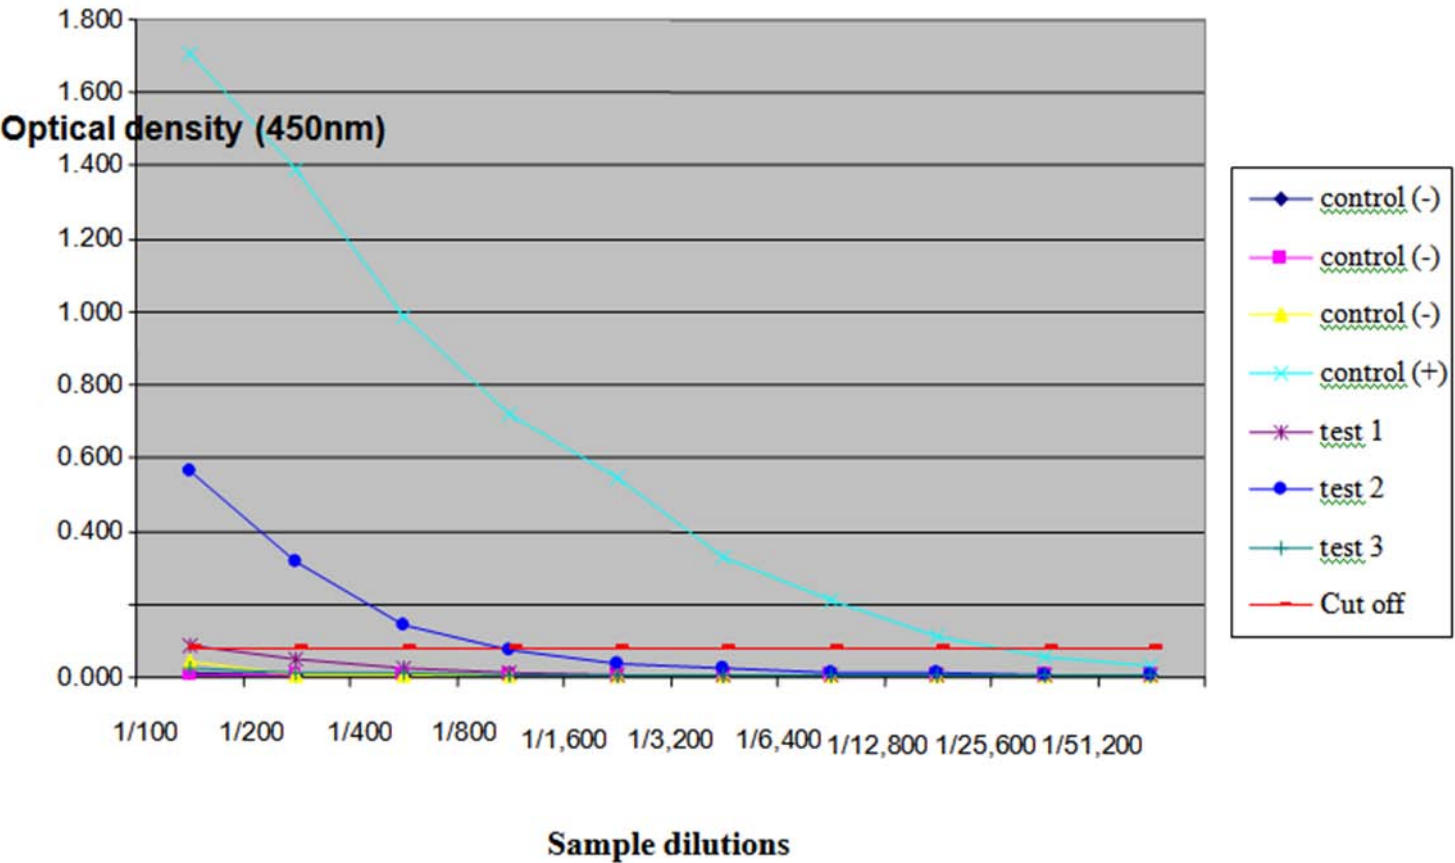

Supplement: 13071_2011_563_MOESM8_ESM.pdf [file 13071_2011_563_MOESM8_ESM.pdf]
